# Supplementary material
Source: publisher site journal article supplement (https://www.dovepress.com/article/447465)
Supplement: Supplementary file 1 [file get_supplementary_file.php]

**A**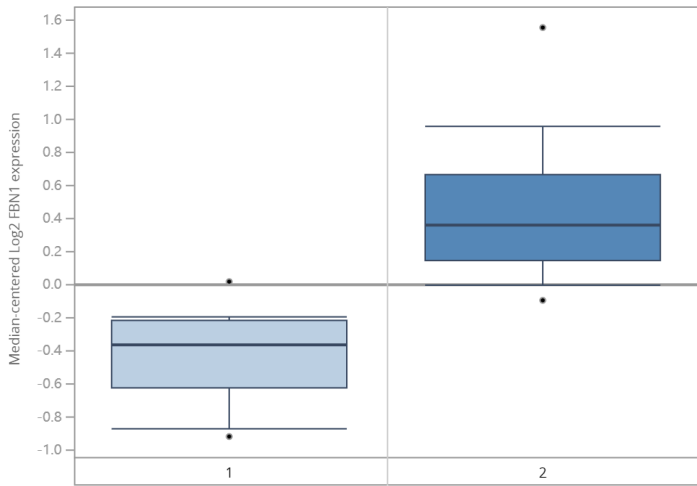**B**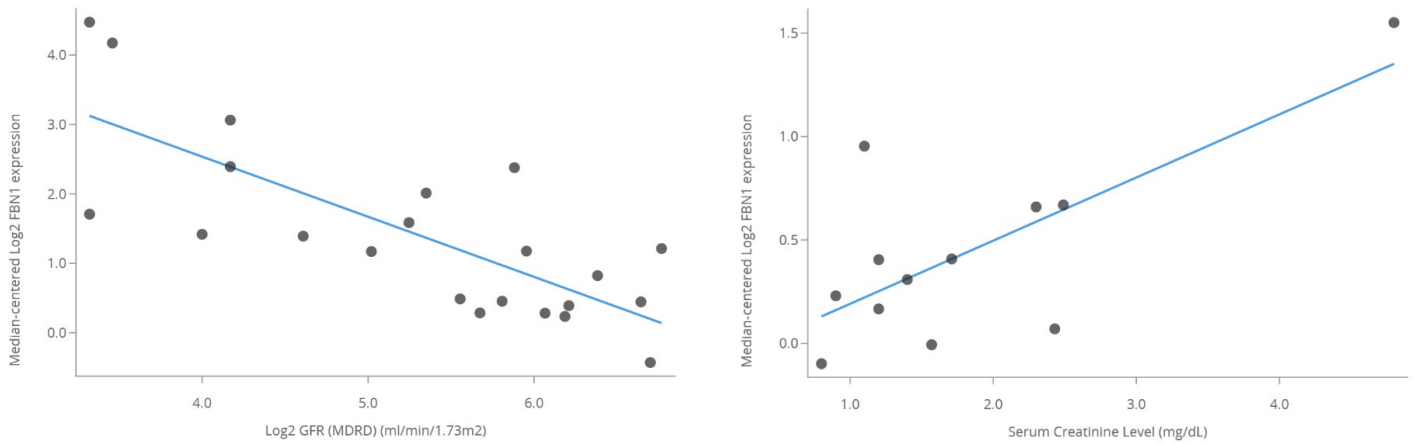

**Supplementary Figure 1** mRNA expression of gene coding asprosin, and its correlation with clinical outcomes. (A) mRNA expression of gene coding for asprosin (FBN1) in kidney tissue from DKD patients,  $P < 0.001$  compared with healthy control. (B) Correlations of FBN1 expression and clinical outcomes including GFR ( $r^2 = 0.591$ ,  $P < 0.001$ ) and serum creatinine ( $r^2 = 0.527$ ,  $P = 0.008$ ). Data were acquired from Nephroseq dataset (nephroseq.org).
